# Supplementary material
Source: HighWire-hosted journal article supplement (https://bmjopen.bmj.com/content/7/9/e015477)

Table of initial search terms (and synonyms), and example of literature searching.

| Adolescence                                                                        | Multiple              | Risk behaviours   | complex                                    | Prevention Strategy       |
|------------------------------------------------------------------------------------|-----------------------|-------------------|--------------------------------------------|---------------------------|
| Adolescents<br>Teenagers<br>Young people<br>Teens<br>Youths<br>Minors<br>Juveniles | Clusters<br>Groups of | Health behaviours | Multiform<br>Multilevel<br>Multi component | Programme<br>Intervention |

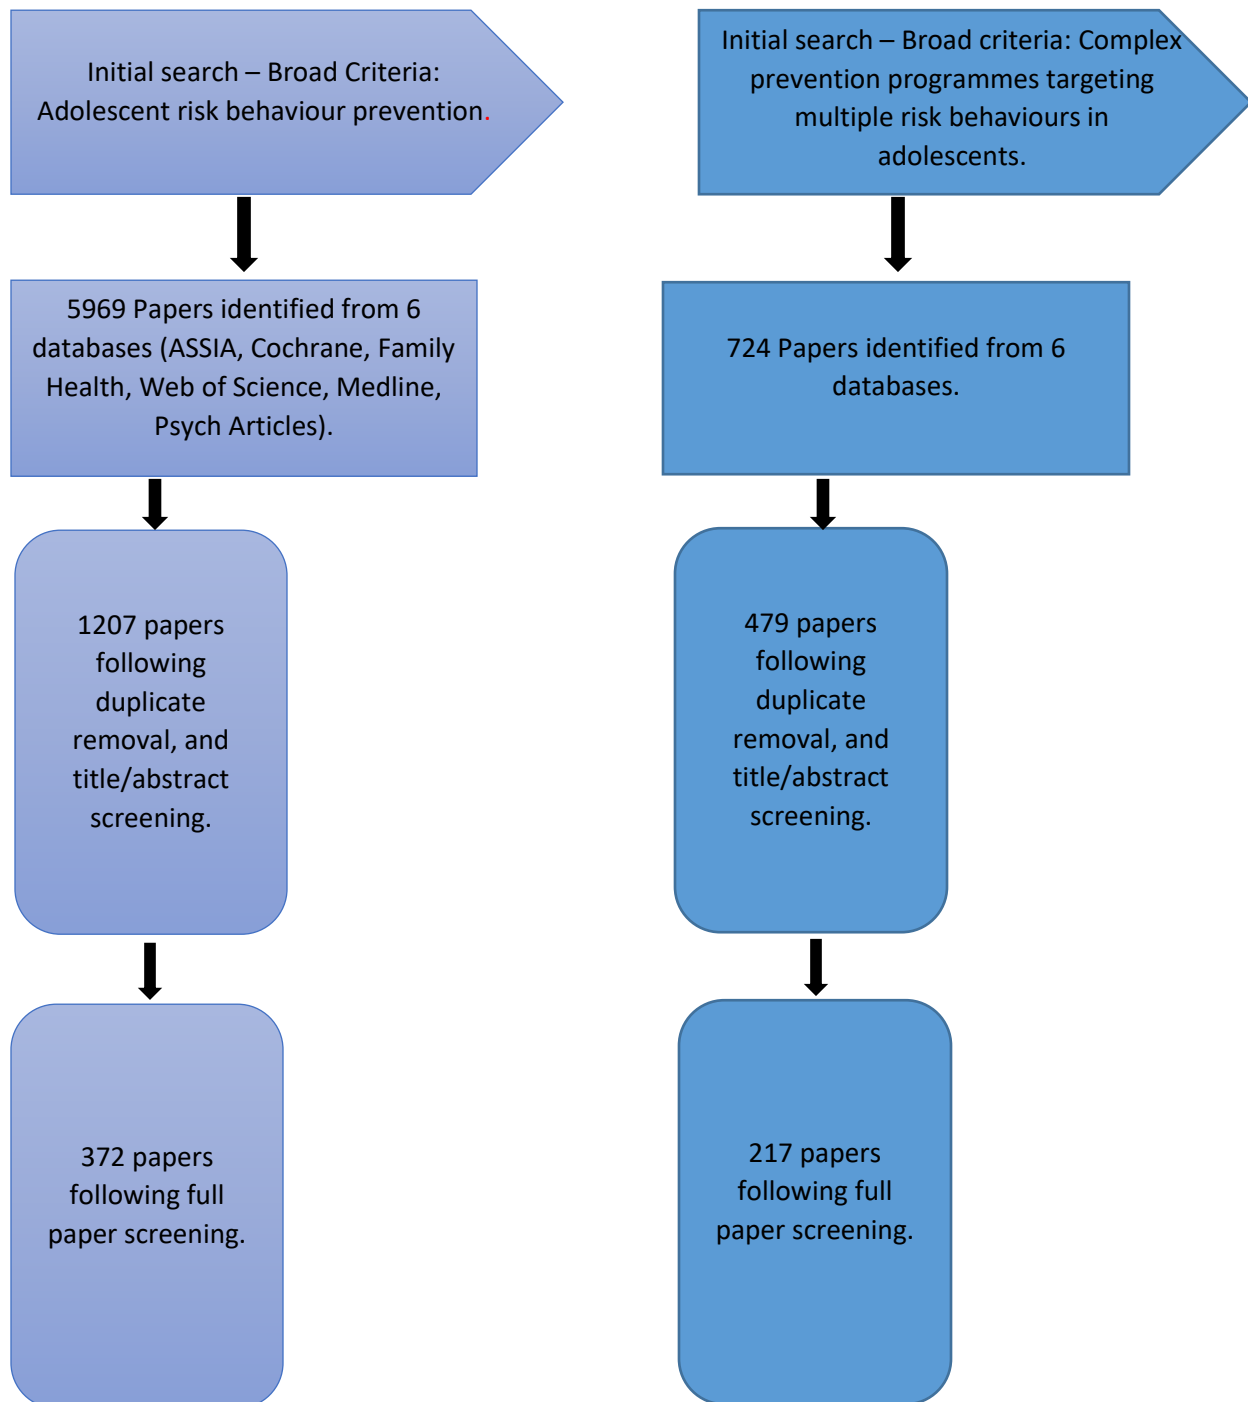

Supplement: inline-supplementary-material-1 [file inline-supplementary-material-1.pdf]
